# Supplementary material
Source: HighWire-hosted journal article supplement (https://jnm.snmjournals.org/highwire/filestream/95518/field_highwire_adjunct_files/0/228825_Supplemental_Data.pdf)
Supplement: 228825_Supplemental_Data.pdf [file 228825_Supplemental_Data.pdf]

**Supplemental Table 1.** Statistical Parametric Mapping of increased mGluR5 availability in alcohol-dependent subject after 6 months of abstinence compared to the baseline condition ( $p_{\text{height}} < 0.001$ ).

| Cluster Level |                      | Voxel Level |                     | Peak Voxel MNI coordinate |     |     | Location            |            |
|---------------|----------------------|-------------|---------------------|---------------------------|-----|-----|---------------------|------------|
| $K_E$         | <i>P value</i>       | <i>T</i>    | <i>P value</i>      | x                         | y   | z   | Anatomical area     | Hemisphere |
| 6058          | $6.1 \cdot 10^{-5*}$ | 22.98       | 0.004               | -18                       | 44  | -12 | Sup Orbitofront gyr | Left       |
|               |                      | 15.60       | 0.018               | 30                        | 42  | -10 | Mid Orbitofront gyr | Right      |
|               |                      | 13.61       | 0.031               | 34                        | 12  | 34  | Mid frontal gyr     | Right      |
|               |                      | 8.48        | $3.1 \cdot 10^{-5}$ | -2                        | 0   | 26  | Middle Cing         | Left       |
|               |                      | 8.47        | $3.2 \cdot 10^{-5}$ | 36                        | 4   | 20  | Insula              | Right      |
|               |                      | 8.36        | $3.4 \cdot 10^{-5}$ | 0                         | 30  | -4  | Ant Cing Cortex     | Right      |
|               |                      | 7.86        | $5.1 \cdot 10^{-5}$ | 40                        | -36 | 38  | Supramarginal gyr   | Right      |
|               |                      | 7.64        | $6.1 \cdot 10^{-5}$ | 14                        | -42 | 26  | Post Cing Cortex    | Right      |
| 1344          | 0.034*               | 10.59       | $7.3 \cdot 10^{-6}$ | 16                        | -8  | -16 | ParaHpc gyr         | Right      |
|               |                      | 6.14        | $2.4 \cdot 10^{-4}$ | 28                        | -2  | 4   | Putamen             | Right      |

BA, Brodmann area;  $K_E$ , cluster size extent (number of  $2 \times 2 \times 2$  mm<sup>3</sup> voxels); mGlu5, metabotropic glutamate receptor subtype 5; MNI, Montreal Neurological Institute; gyr, gyrus.

\* Corrected for familywise error.

**Supplemental Table 2.** Effect of baseline mGluR5 availability ( $[^{18}\text{F}]\text{FPEB } V_T$ ) on the number of drinks consumed per week during follow-up.

| <b>VOI</b>           | <b>IRR (95% CI)</b> | <b><i>p</i></b> |
|----------------------|---------------------|-----------------|
| PFC                  | 0.94 (0.57; 1.57)   | 0.82            |
| Dorsolateral PFC     | 0.99 (0.58; 1.72)   | 0.99            |
| Ventrolateral PFC    | 0.91 (0.56; 1.49)   | 0.70            |
| Ventromedial PFC     | 0.92 (0.62; 1.39)   | 0.71            |
| Orbitofrontal cortex | 0.96 (0.59; 1.55)   | 0.86            |
| Anterior cingulate   | 0.95 (0.63; 1.43)   | 0.80            |
| Posterior cingulate  | 0.92 (0.59; 1.46)   | 0.74            |
| Insula               | 0.95 (0.61; 1.47)   | 0.80            |
| Temporal lobe        | 0.90 (0.57; 1.43)   | 0.66            |
| Hippocampus          | 0.93 (0.57; 1.51)   | 0.77            |
| Amygdala             | 1.03 (0.72; 1.47)   | 0.87            |
| Parietal lobe        | 0.89 (0.51; 1.53)   | 0.66            |
| Occipital lobe       | 0.90 (0.52; 1.58)   | 0.72            |
| Caudate nucleus      | 0.80 (0.42; 1.53)   | 0.49            |
| Putamen              | 1.07 (0.67; 1.69)   | 0.77            |
| Nucleus accumbens    | 1.03 (0.69; 1.54)   | 0.88            |
| Thalamus             | 1.24 (0.59; 2.58)   | 0.56            |
| Cerebellum           | 1.02 (0.40; 2.58)   | 0.96            |

For each patient, the average weekly consumption (number of drinks) was calculated per month. Results are presented as incidence rate ratios (with 95% CIs), expressing the percentage change in consumption associated with a one-unit increase of the predictor ( $V_T$ ). IRR > (<) 1 indicates higher (lower) number of drinks with increasing  $V_T$  (e.g., IRR = 0.9 (1.1) means 10% decrease (increase) in number of drinks with 1 unit increase in  $V_T$ ).

*Abbreviations:* IRR, incidence rate ratio; CI, confidence interval.

**Supplemental Figure 1.** Grey matter volumes normalized by the total intra-cranial volume in alcohol-dependent patients at baseline (ALC baseline,  $n = 16$ ), at 2 and 6 months of abstinence follow-up (ALC 2 months,  $n = 10$ , and ALC 6 months,  $n = 8$ ).

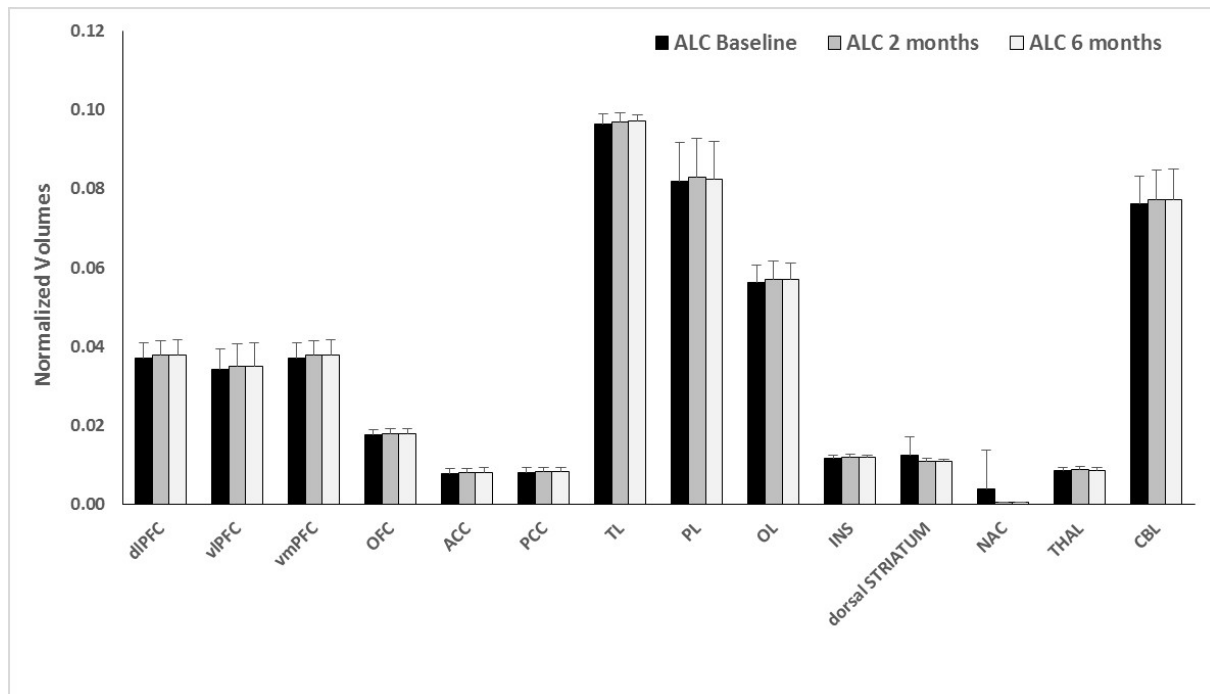

*Abbreviations:* dlPFC, dorsolateral prefrontal cortex; vlPFC, ventrolateral prefrontal cortex; vmPFC, ventromedial prefrontal cortex; OFC, orbitofrontal cortex; ACC, anterior cingulate cortex; PCC, posterior cingulate cortex; TL, temporal lobe; PL, parietal lobe; OL, occipital lobe; INS, insula; NAC, nucleus accumbens; THAL, thalamus; CBL, cerebellum.

**Supplemental Figure 2.** Average [ $^{18}\text{F}$ ]FPEB  $V_T$  (no partial volume correction, no PVC) in healthy controls (CON,  $n = 32$ ) and in alcohol-dependent subjects (ALC) at baseline (recent detoxification;  $n = 16$ ) and at the 2-month ( $n = 10$ ) and 6-month ( $n = 8$ ) follow-up during abstinence. Error bars represent one SD.

Statistical significances were reported only for ALC 2 and 6 months compared to CON. ALC baseline versus Controls was reported in (7).

\* $p < 0.05$ , Two-sided independent t-test;

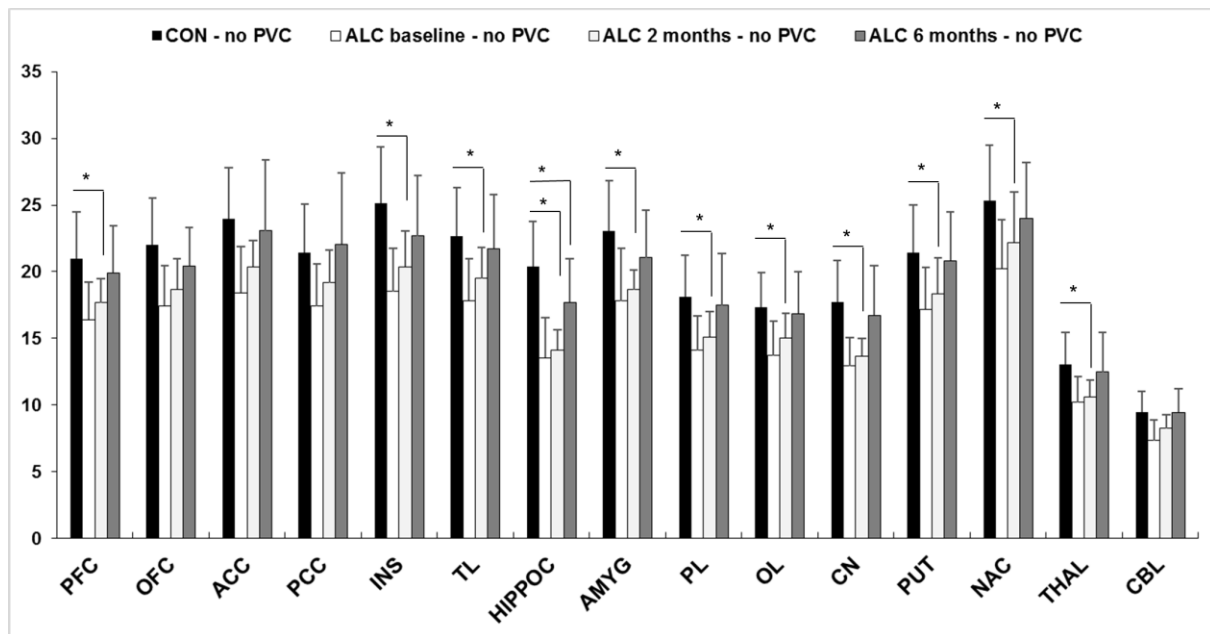

*Abbreviations:* PFC, prefrontal cortex; OFC, orbitofrontal cortex; ACC, anterior cingulate cortex; PCC, posterior cingulate cortex; INS, insula; TL, temporal lobe; HIPPOC, hippocampus; AMYG, amygdala; PL, parietal lobe; OL, occipital lobe; CN, caudate nucleus; PUT, putamen; NAC, nucleus accumbens; THAL, thalamus; CBL, cerebellum.
